# Supplementary material for: A Placebo-Controlled Trial of Oral Fingolimod in Relapsing Multiple Sclerosis
Source: Atypon-hosted journal article supplement (doi:10.1056/nejmoa0909494), 2010-01-20
Supplement: nejm_kappos_387sa1.pdf [file nejm_kappos_387sa1.pdf]

## Supplementary Appendix

This appendix has been provided by the authors to give readers additional information about their work.

Supplement to: Kappos L, Radue E-W, O'Connor P, et al. A placebo-controlled trial of oral fingolimod in relapsing multiple sclerosis. *N Engl J Med* 2010;362:387-401. DOI: 10.1056/NEJMoa0909494.

## ONLINE APPENDIX

### STUDY GROUP

The following people participated in the study:

**Data and Safety Monitoring Board:** T. Calandra, Centre Hospitalier Universitaire Vaudois, Lausanne, Switzerland; J. DiMarco, University VA Health System–Cardiology, Charlottesville, VA, USA; J.D. Easton (Chair), Rhode Island Hospital–Brown Medical School, Providence, RI, USA; L.D. Hudson, University of Washington, Seattle, WA, USA; J. Kesselring, Neurology, Rehabilitation Center, Valens, Switzerland; A. Laupacis, Li Ka Shing Knowledge Institute, St. Michael's Hospital, Toronto, ON, Canada; N. Temkin, University of Washington, Redmond, WA, USA; B.G. Weinshenker, Mayo Clinic College of Medicine, Rochester, MN, USA; M. Zarbin, Institute of Ophthalmology and Visual Sciences, UMDNJ Medical School/Ophthalmology, Newark, NJ, USA;

**Steering Committee:** P. Calabresi, Johns Hopkins Hospital, Baltimore, MD, USA; R. Hohlfeld, Institut für Klinische Neuroimmunologie, München, Germany; L. Kappos (Chair), University Hospital, Basel, Switzerland; P. O'Connor, St. Michael's Hospital, Toronto, ON, Canada; C. Polman, VU University Medical Center, Amsterdam, the Netherlands;

**Principal Investigators** (responsible for data collection): Australia: R. Beran, Strategic Health Evaluators, Chatswood; M. Paine St. Vincent's Hospital, Fitzroy; R. MacDonell, (N-CRESS) NeuroImmunology Clinical Research, Heidelberg; R. Heard, North Gosford Private Hospital, North Gosford; K. Boundy, Queen Elizabeth Hospital, Woodville; Belgium: L. Van Opdenbosch, Algemeen Ziekenhuis St. Jan, Brugge; E. Bartholomé, M. Pandololfo, CHU Erasme, Brussels; P. Seeldrayers, CHU Charleroi Hôpital Civil, Charleroi; B. Dubois, UZ Gasthuisberg, Leuven; L. Vande Gaer, MS & Revalidatie Centrum, Overpelt; D. Decoo, AZ ALMA, Sijsele; E. Mulleners, Regionaal Ziekenhuis, St. Truiden; Canada: V. Bhan, Dalhousie MS Research Unit, Halifax, NS; D. Brunet, Kingston General Hospital, Kingston, ON; M. Kremenutzky, London Health Services Centre, London, ON; D.H. Selchen, Trillium Health Center, Mississauga, ON; J. Lachapelle, Maisonneuve-Rosemont Hospital, Montreal, QC; S. Christie, Children's Hospital of Eastern Ontario, Ottawa, ON; F. Veloso, The Medical Centre, Pasqua Hospital, Regina, SK; P. O'Connor, St. Michael's Hospital, Toronto, ON; V. Devonshire, MS Clinical Research Group UBC Hospital, Vancouver, BC; Czech Republic: I. Rektor, Faculty Hospital St. Anne, Brno; V. Ondrich, Military Hospital, Brno; P. Kanovsky, Faculty Hospital, Olomouc; O. Zapletalová, Faculty

Hospital of Ostrava, Ostrava; Z. Ambler, Faculty Hospital of Plzeň, Plzeň; E. Ehler, Neurologická Klinika, Pradubice; E. Meluzinova, Hospital Motol, Prague; E. Havrdová, MS Centrum, Prague; L. Pazdera, O. Vysata, Centrum Neurologické Peče v Rychnově nad Knežnou, Rychnov nad Knežnou; M. Vachova, Krajské Zdravotní, A.S. – Nemocnice Teplice, O.Z., Teplice; Estonia: K. Gross-Paju, Laane-Tallinna Keskhaigla, Tallinn; Finland: M. Kallela, Postitalon Lääkäriasema, Helsinki; E. Kinnunen, Hyvinkään Sairaala, Hyvinkää; M-L, Sumelahti, Suomen Terveystalo, Tampere; J-P, Eralinna, Suomen Terveystalo Clinical Research Oy, Turku; L. Airas, Turun Yliopistollinen Keskussairaala, Turku; France: P. Clavelou, Hôpital Gabriel Montpied Neurologie, Clermont-Ferrand; T. Moreau, Hôpital Général – CHU Dijon, Dijon; P. Vermersch, Hôpital Roger Salengro, Lille; J. Pelletier, CHU La Timone, Marseille; W. Camu, Service des Explorations Neurologiques et Epileptologie, Montpellier; P. Damier, S. Wiertelowski, Centre Hospitalier Nord Laennec, Nantes; P. Labauge, CHU Caremeau, Nîmes; O. Gout, Fondation Rothschild, Paris; C. Lubetzki, Groupe Hospitalier de la Pitié-Salpêtrière, Paris; G. Edan, CHU Pontchaillou, Rennes; J. De Seze Hôpital Civil, Strasbourg; Germany: S. Menck, Praxen für Neurologie and Psychatrie, Barsinghausen; J. Haas, Jüdisches Krankenhaus, Berlin; M. Einhäupl, L. Harms, K-P, Wandinger, Klinik und Poliklinik für Neurologie, Berlin; F. Zipp, Universitätsklinikum Charité, Berlin; B. Kieseier, Heinrich-Heine-Universität, Düsseldorf; D. Anders, M. Berghoff, P. Oschmann, Justus-Liebig University of Giessen, Giessen; T. Rosenkranz, Asklepios Klinik St. Georg, Hamburg; C. Heesen, Universitätsklinikum Hamburg-Eppendorf, Hamburg; F.T. Bergh, Universitätsklinikum Leipzig, Leipzig; M. Sailer, Universitätsklinikum Magdeburg, Magdeburg; R. Hohlfeld, Institut für Klinische Neuroimmunologie, München; F. Bischoff, Neurologische Gemeinschaftspraxis am Marienplatz, München; M. Marziniak, M. Müller, Universitätsklinikum Münster, Münster; I. Kleiter, A. Steinbrecher, Klinik und Poliklinik für Neurologie der Universität Regensburg im Bezirksklinikum, Regensburg; A. Kowalik, private practice Stuttgart; A. Melms, R. Weissert, Universitätsklinikum Tübingen, Tübingen; H. Wiendl, Universitätsklinikum Würzburg; Greece: C. Karageorgiou, General Hospital of Athens “G. Gennimatas”, Athens; N. Fakas, 401 General Military Hospital of Athens, Athens; M. Maltezou, 1<sup>st</sup> IKA Papadimitriou, Melissa, Athens; D. Mitsikostas, Navy Hospital of Athens, Athens; Hungary: Z. Káposzta, C. Rozsa, Jahn Ferenc Korház, Budapest; A. Valikovics, B.A.Z. Megyei Korház, Miskolc; L. Kerényi, Fejér Megyei Szent György Korház, Szekesfehervar; Ireland: M. Hutchinson, St. Vincent’s University Hospital, Dublin; Israel: R. Milo, Barzilai Medical Center, Ashkelon; A. Miller, Carmel Medical Center, Haifa; R. Shahien, Sieff Hospital, Safed; A. Achiron, Sheba Medical Center, Tel Hashomer; The

Netherlands: C. Polman, Academisch Ziekenhuis VU, Amsterdam; S. Frequin, St. Antonius Ziekenhuis, Nieuwegein; P. Jongen, C. Zwanikken, Stichting Multiple Sclerosis, Nijmegen; R. Hintzen, Erasmus MS, Rotterdam; B. Anten, R. Hupperts, Orbis Medisch Centrum, Sittard-Geleen; L. Visser, Sint Elisabeth Ziekenhuis, Tilburg; Poland: J. Kochanowicz, Niezalezny Zespol Opieki Zdrowotnej "Kendron", Bialystok; W. Drozdowski, Samodzielny Publiczny Szpital Kliniczny, Bialystok; W. Fryze, Wojewódzki Szpital Specjalistyczny im M. Kopernika w Gdańsku, Gdańsku; A. Wajgt, Samodzielny Publiczny Centralny Szpital Kliniczny, Katowice; K. Selmaj, Uniwersytecki Szpital Kliniczny Łódź; W. Kozubski, Samodzielny Publiczny Szpital Kliniczny, Poznań; M. Dorobek, J. Pniewski, Centralny Szpital Kliniczny, Warsaw; A. Czlonkowska, Instytut Psychiatrii i Neurologii, Warsaw; H. Kwiecinski, Samodzielny Publiczny Centralny Szpital Kliniczny Warszawskiego Uniwersytetu, Warsaw; A. Stepien, Klinika Neurologiczna z Pododdziałem Udarowym, Warsaw; Romania: C. Panea, Elias Emergency Hospital, Bucharest; G. Boeru, University Emergency Central Military Hospital, Bucharest; L. Perju-Dumbrava, Clinical County Hospital Cluj, Cluj-Napoca; C. Zaharia, Neuropsychiatry Hospital, Craiova; C.D. Popescu, Clinical Hospital of Rehabilitation Iasi, Iasi; R. Balasa, County Hospital Targu Mures, Targu Mures; O. Bejenaru, University Emergency Hospital, Targu Mures; Russia: E.Z. Yakupov, GOUVPO Kazan State Medical University of Roszdrav, Kazan; N. Yakhno, GOUVPO Moscow Medical Academy, Moscow; S. Kotov, GU Moscow Regional Research Clinical Institute, Moscow; V. Shmyrev, FGU Central Clinical Hospital, Moscow; I. Zavalishin, Scientific Research Institute of Neurology of RAMS, Moscow; A.P. Elchaninov, FGUZ Clinical hospital no. 122, St. Petersburg; I. Stolyarov, Institution of Russian Academy of Science, St. Petersburg; M. Odinak, Military Medical Academy, St. Petersburg; Slovakia: P. Turcani, Poliklinikou Bratislava, Bratislava; E. Kurča, Neurologická Klinika Martinská, Martin; J. Vyletělka, Poliklinikou Žilina, Žilina; South Africa: J Heckman, Groote Schuur Hospital Observatory, Cape Town; M. Isaacs, Medical and Dental Centre; Rosebank; C. Coetzee, Netcare Umhlanga Hospital Medical Centre, Umhlanga Rocks; Sweden: J. Lycke, Sahlgrenska Universitetssjukhuset, Göteborg; J. Hillert, T. Olsson, Karolinska University Hospital, Stockholm; Switzerland: L. Kappos, K. Gugleta, R. Sturzenegger, University Hospital, Basel; M. Schluep, Centre Hospitalier Universitaire Vaudois, Lausanne; N. Goebels, M. Linnebank, Universitätsspital Zürich; Turkey: C. Irkec, Gazi Universitesi, Ankara; R. Karabudak, Hacettepe Universitesi, Ankara; O.F. Turan, Uludag Universitesi, Bursa; M. Neyal, Gaziantep Universitesi, Gaziantep; N. Işik, T.C. Saglik Bakanligi Goztepe Egitim ve Arastirma Hastanesi, Istanbul; P.N. Sutlas, Bakirkoy Ruh ve Sinir Hastaliklari Hastanesi, Istanbul; G. Akman-Demir, A. Siva, Istanbul Universitesi,

Istanbul; E. Idiman, Dokuz Eylul Universitesi, Izmir; A. Kocaman, Ege University, Izmir; Y. Zorlu, Saglik Bakanligi Tepecik Hastanesi, Izmir; S. Sevim Mersin Üniversitesi, Mersin; United Kingdom: D. Cottrell, Franchay Hospital, Bristol; E. Silber, King's College Hospital, London; D. Barnes, St George's Hospital, London; D. Bates, Royal Victoria Infirmary, Newcastle-Upon-Tyne; C. Constantinescu, University Hospital, Nottingham; B. Sharrack, Royal Hallamshire Hospital, Sheffield; **MS-MRI Evaluation Center:** K. Bendfeldt, E.W. Radue, University Hospital, Basel, Switzerland.

## **ADDITIONAL METHODOLOGICAL DETAILS**

### **Study Endpoint and Procedures**

In addition to the evaluations outlined in the main manuscript, ophthalmic examinations and pulmonary function tests were performed at screening and months 1, 3, 6, 12, 18, and 24. Ophthalmic examination included eye history, visual acuity, and dilated ophthalmoscopy. All patients underwent optical coherence tomography assessments to evaluate macular thickness at screening and month 24. Following reports of skin malignancies in the fingolimod phase 2 study,<sup>1,2</sup> the protocol was amended to include regular dermatologic monitoring of all patients: monthly self-examination by patients and examination by a dermatologist at months 12 and 24. All participants had been enrolled when this amendment was implemented, so the initial dermatologist examination occurred for all patients after dosing had commenced. An independent physician monitored patients' vital signs after the first dose of oral medication. Sitting heart rate and blood pressure were assessed before the first dose and every hour for at least 6 hours after the first dose. Electrocardiograms (ECGs) were also assessed at baseline or pre-dose and post baseline. Patients were discharged after administration of the first dose when all the following criteria were met: heart rate of at least 51 bpm, heart rate more than 80% of baseline value, heart rate at discharge not the lowest hourly value of the monitoring period, no symptoms of decreased heart rate, no treatment for bradycardia received, and ECG at 6 hours did not show any significant abnormalities versus pre-dose other than sinus bradycardia. Patients experiencing symptomatic reductions in heart rate were hospitalized overnight.

Relapses were treated with methylprednisolone up to 1000 mg/day for 3–5 days without an oral taper.

Magnetic resonance imaging (MRI) scans were acquired according to a standard protocol. The scans were processed centrally at the MS MRI Evaluation Center (Basel, Switzerland). The central reader checked the scans for completeness

and quality, then all scans were analyzed by blinded readers. Subsequently, the scans were sent electronically to the Contract Research Organization (PPD Inc), which monitored the entire study. T1-weighted images, before and after administration of single-dose gadolinium (Gd) diethylenetriamine penta-acetic acid (0.1 mmol/kg), and dual-echo T2-weighted images were obtained at screening and months 6, 12, and 24. Numbers of new or enlarging T2 lesions, number and volume of Gd-enhancing lesions, total volume of T2 lesions, total volume of T1 hypointense lesions, and brain volume at baseline and change over time were obtained according to a standard protocol. Once lesions were identified and marked by the radiologist following a detailed plaque-marking and -segmenting protocol, volume calculations were performed separately by specially trained technicians (intra-rater variability of  $\leq 5\%$ ) using an interactive segmentation program on the Amira<sup>®</sup> platform (Mercury Computer Systems GmbH). Segmented lesions were reviewed and approved by a neuroradiologist. Brain volume change calculations were performed using the fully-automated structural image evaluation of normalized atrophy (SIENA) software (Function MRI of the Brain Analysis Group, Oxford, England). At baseline, SIENA utilized a single-time-point method (SIENAX) to estimate the normalized brain volume. Details about assessment of relapses and disability progression are provided in the main manuscript.

### **Statistical analyses (not reported in the Methods)**

The primary analysis population for all efficacy analyses was the intent-to-treat (ITT) population. Baseline characteristics were compared for treatment differences using the Cochran-Mantel-Haenszel test stratified by country for gender, proportion of patients with history of disease modifying treatment, and proportion of patients free from Gd-enhancing lesions. An analysis of covariance (ANCOVA) model adjusted for treatment and country was used to assess the remaining baseline characteristics.

For most secondary efficacy analyses, three pair-wise treatment comparisons were made: fingolimod 1.25 mg versus placebo, fingolimod 0.5 mg versus placebo, fingolimod 1.25 mg versus fingolimod 0.5 mg.

Time to first relapse was compared using the log-rank test (main analysis) and Cox's proportional hazards model adjusted for treatment, country, number of relapses in the 2 years before baseline, and baseline Expanded Disability Status Scale (EDSS) score (supportive analysis).

Changes in EDSS and Multiple Sclerosis Functional Composite scores from baseline were compared between treatment groups using ANCOVA on ranks adjusted for treatment group, country, corresponding baseline value, and age.

The MRI efficacy variables (continuous and count) were presented as summary statistics. For the analyses of the proportions of patients free from Gd-enhancing lesions or new or enlarged T2 lesions, treatment comparisons were tested using the logistic regression model adjusting for treatment group, country, and the corresponding baseline number of lesions (when available). For the number of new or newly enlarged T2 lesions, treatment comparisons were tested with a negative binomial model adjusted for treatment group and country.

Rank ANCOVA adjusted for treatment group, country, and corresponding baseline values were used for treatment comparisons of the number of Gd-enhancing lesions, MRI volumes (percent change from baseline in total volume of T2 lesions, percent change from baseline in total volume of T1 hypointense lesions), and percent change from baseline in brain volume.

#### *Safety and tolerability endpoints*

Assessment of safety was summarized based primarily on the frequency of adverse events, serious adverse events and notable laboratory abnormalities using the safety population. Other safety data were summarized as appropriate. Data from specific tests (e.g. ECG or vital signs) were listed, notable values were flagged, and any other information collected was listed as appropriate.

## ADDITIONAL DETAILS ON ADVERSE EVENTS OF SPECIAL INTEREST AND SELECTED CLINICALLY NOTABLE HEMATOLOGY AND BIOCHEMISTRY VALUES

### Multiple sclerosis relapses reported as serious adverse events:

The symptoms observed were typical of multiple sclerosis relapses, except in one case, reported previously.<sup>3</sup> In this case (a 27-year-old patient), the neurological examination was normal 6 months after onset of the initial relapse, except for mild cognitive sequelae and slightly reduced drive (EDSS score of 2 points); the patient returned to work on a part-time basis. Wider use of fingolimod, may better inform whether the few severe relapses observed in patients randomized to this drug were a chance phenomenon or are associated with a distinguishable risk profile.

**E-Table 1.** Selected clinically notable hematology and biochemistry values.

|                                     | Fingolimod         |                   | Placebo<br>(N=418) |
|-------------------------------------|--------------------|-------------------|--------------------|
|                                     | 1.25 mg<br>(N=429) | 0.5 mg<br>(N=425) |                    |
| White blood cell count ( $10^9/L$ ) |                    |                   |                    |
| Baseline, mean $\pm$ SD             | 6.81 $\pm$ 2.01    | 6.50 $\pm$ 1.81   | 6.64 $\pm$ 1.88    |
| Month 24, mean $\pm$ SD             | 4.03 $\pm$ 1.44    | 4.24 $\pm$ 1.61   | 6.47 $\pm$ 1.93    |
| Lymphocyte count ( $10^9/L$ )       |                    |                   |                    |
| Baseline, mean $\pm$ SD             | 1.85 $\pm$ 0.54    | 1.84 $\pm$ 0.62   | 1.82 $\pm$ 0.56    |
| Month 24, mean $\pm$ SD             | 0.42 $\pm$ 0.26    | 0.49 $\pm$ 0.34   | 1.76 $\pm$ 0.57    |
| Neutrophil count ( $10^9/L$ )       |                    |                   |                    |
| Baseline, mean $\pm$ SD             | 4.28 $\pm$ 1.64    | 4.02 $\pm$ 1.45   | 4.16 $\pm$ 1.54    |
| Month 24, mean $\pm$ SD             | 3.06 $\pm$ 1.28    | 3.22 $\pm$ 1.42   | 4.07 $\pm$ 1.57    |
| Alanine transaminase (U/L)          |                    |                   |                    |
| Baseline, mean $\pm$ SD             | 18.85 $\pm$ 10.40  | 19.81 $\pm$ 11.46 | 20.60 $\pm$ 13.30  |
| Month 24, mean $\pm$ SD             | 32.15 $\pm$ 21.24  | 33.33 $\pm$ 23.13 | 21.19 $\pm$ 13.98  |
| $\geq 3$ xULN, no. (%)              | 53 (12.5)          | 36 (8.5)          | 7 (1.7)            |
| $\geq 5$ xULN, no. (%)              | 13 (3.1)           | 8 (1.9)           | 4 (1.0)            |

SD, standard deviation; ULN, upper limit of normal

## References

1. Kappos L, Antel J, Comi G, et al. Oral fingolimod (FTY720) for relapsing multiple sclerosis. *N Engl J Med* 2006;355(11):1124-1140.
2. O'Connor P, Comi G, Montalban X, et al. Oral fingolimod (FTY720) in multiple sclerosis: Two-year results of a phase II extension study. *Neurology* 2009;72:73-79.
3. Leypoldt F, Munchau A, Moeller F, Bester M, Gerloff C, Heesen C. Hemorrhagic focal encephalitis under fingolimod (FTY720) treatment: a case report. *Neurology* 2009;72(11):1022-1024.
